# Supplementary material for: Redox-switchable Pickering emulsion stabilized by hexaniobate-based ionic liquid for oxidation catalysis
Source: Royal Society of Chemistry journal article supplement (doi:10.1039/d3dt00973d), 2023-01-01
Supplement: d3dt00973d1.pdf [file d3dt00973d1.pdf]

**Supporting Information**

**Redox-Switchable Pickering Emulsion Stabilized  
by Hexaniobate-based Ionic Liquid for Oxidation  
Catalysis**

Wei Lu, Jing Dong,\* Di Zhang, Peng Lei, Yingnan Chi\* and Changwen Hu

## Table of Contents

### 1. Characterization

Figure S1.  $^1\text{H}$  NMR spectra of  $[\text{C}_{16}\text{MIM}]\text{Nb}_6$  in  $\text{CDCl}_3$ .

Figure S2. XPS survey of  $[\text{C}_{16}\text{MIM}]\text{Nb}_6$ .

Figure S3. Thermogravimetric analyses of  $[\text{C}_{16}\text{MIM}]\text{Nb}_6$  (a),  $[\text{C}_{14}\text{MIM}]\text{Nb}_6$  (b), and  $[\text{C}_{12}\text{MIM}]\text{Nb}_6$  (c).

Figure S4. Confocal microscopy images of Pickering emulsion formed by  $\text{H}_2\text{O}_2$ -treated  $[\text{C}_{16}\text{MIM}]\text{Nb}_6$ .

Figure S5. XPS spectra of  $[\text{C}_{16}\text{MIM}]\text{Nb}_6$  and  $[\text{C}_{16}\text{MIM}]\text{Nb}_6\text{-O}_2$ .

Figure S6. Zeta potential of  $[\text{C}_{16}\text{MIM}]\text{Nb}_6$  and  $[\text{C}_{16}\text{MIM}]\text{Nb}_6\text{-O}_2$ .

Figure S7. SEM image of  $[\text{C}_{16}\text{MIM}]\text{Nb}_6$ .

Figure S8. Particle size of the three amphiphilic hexaniobate-based ionic liquids measured by DLS.

Figure S9. Optical micrographs of the Pickering emulsion stabilized by  $[\text{C}_{16}\text{MIM}]\text{Nb}_6\text{-O}_2$  (left) and SEM images of the emulsifiers (right).

Figure S10. FT-IR spectra of  $[\text{C}_{14}\text{MIM}]\text{Nb}_6$  and  $[\text{C}_{14}\text{MIM}]\text{Nb}_6\text{-O}_2$ .

Figure S11. FT-IR spectra of  $[\text{C}_{12}\text{MIM}]\text{Nb}_6$  and  $[\text{C}_{12}\text{MIM}]\text{Nb}_6\text{-O}_2$ .

Figure S12.  $^1\text{H}$  NMR spectra of  $[\text{C}_{14}\text{MIM}]\text{Nb}_6$  in  $\text{CDCl}_3$ .

Figure S13.  $^1\text{H}$  NMR spectra of  $[\text{C}_{12}\text{MIM}]\text{Nb}_6$  in  $\text{CDCl}_3$ .

Figure S14. (a) SEM image of  $[\text{C}_{12}\text{MIM}]\text{Nb}_6\text{-O}_2$  (inset: water contact angle); (b) SEM image of  $[\text{C}_{14}\text{MIM}]\text{Nb}_6\text{-O}_2$  (inset: water contact angle); (c) microscope photograph of the oil-water system containing  $[\text{C}_{12}\text{MIM}]\text{Nb}_6\text{-O}_2$ ; (d) microscope photograph of Pickering emulsion stabilized by  $[\text{C}_{14}\text{MIM}]\text{Nb}_6\text{-O}_2$ .

Figure S15. The optical micrographs of the reversible redox-triggered emulsification and demulsification of the Pickering emulsion containing  $[\text{C}_{14}\text{MIM}]\text{Nb}_6\text{-O}_2$ .

Figure S16. Optical micrographs of isooctane-water emulsion system stabilized with  $[\text{C}_{16}\text{MIM}]\text{Nb}_6\text{-O}_2$ .

Figure S17. Optical micrographs of *n*-heptane-water emulsion system stabilized with  $[\text{C}_{16}\text{MIM}]\text{Nb}_6\text{-O}_2$ .

Figure S18. The GC-MS spectrum of the oxidation product of DBT.

Figure S19. The optical micrographs of emulsion droplets in the recycle test.

Figure S20. Photographs of redox-responsive Pickering emulsion.

Figure S21. FT-IR spectra of  $[\text{C}_{16}\text{MIM}]\text{Nb}_6\text{-O}_2$  before and after the catalytic reaction.

Table S1. The elemental analysis of  $[\text{C}_n\text{MIM}]\text{Nb}_6$ .

Table S2. Oxidative desulfurization of DBT and other S-containing compounds in the Pickering emulsion system.

Table S3. Comparison of stimuli-responsive emulsion systems.

Table S4. Comparison of polyoxometalate-based emulsion catalysts in oxidative desulfurization of DBT.

### 2. References

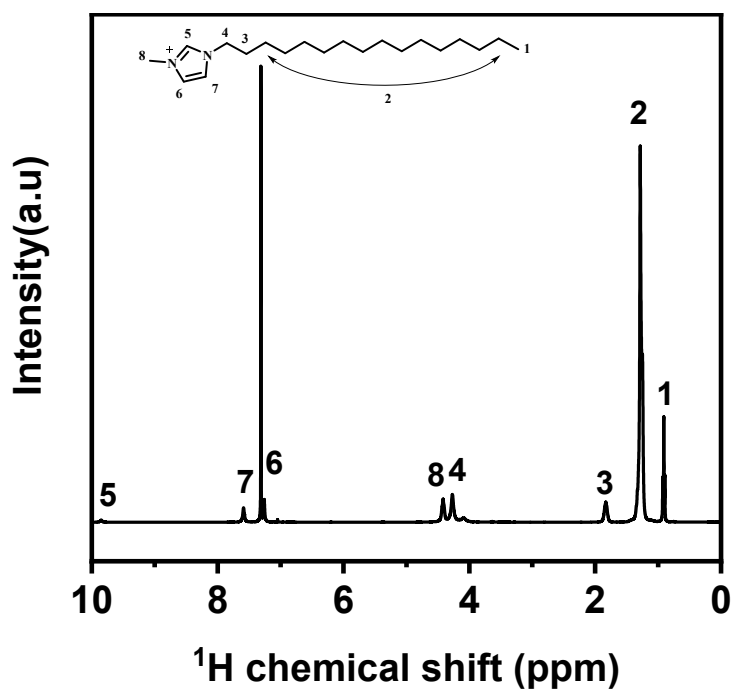

**Figure S1.**  $^1\text{H}$  NMR spectra of  $[\text{C}_{16}\text{MIM}]\text{Nb}_6$  in  $\text{CDCl}_3$ .  $^1\text{H}$  NMR (400 MHz,  $\text{CDCl}_3$ ) of  $[\text{C}_{16}\text{MIM}]\text{Nb}_6$ ,  $\delta$  9.96 (s, 1H), 7.49 (s, 1H), 7.22 (s, 1H), 4.41 (s, 2H), 4.24 (s, 3H), 1.82 (s, 2H), 1.23 (d,  $J = 12.5$  Hz, 26H), 0.87 (t,  $J = 6.8$  Hz, 3H).

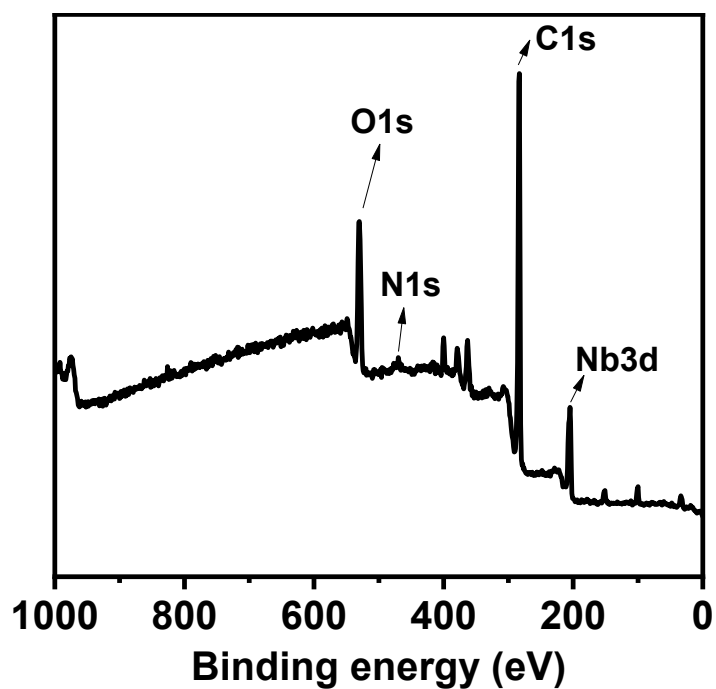

**Figure S2.** XPS survey of  $[\text{C}_{16}\text{MIM}]\text{Nb}_6$ .

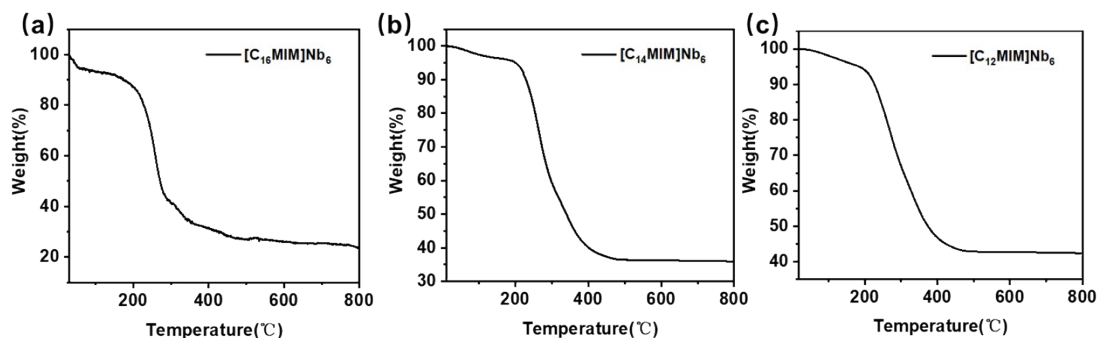

**Figure S3.** Thermogravimetric analyses of  $[C_{16}MIM]Nb_6$  (a),  $[C_{14}MIM]Nb_6$  (b), and  $[C_{12}MIM]Nb_6$  (c). For  $[C_{16}MIM]Nb_6$ , the first weight loss of 8 % between 24-153 °C can be ascribed to the loss of crystallographic water molecules. The second step weight loss of 65.4 % in the range of 153-549 °C is attributed to the decomposition of 1-hexadecyl-3-methylimidazolium cation. For  $[C_{14}MIM]Nb_6$ , the first weight loss of 4.0 % in the range of 20-172 °C is due to the removal of lattice water molecules. The second step weight loss of 59.6 % at 172-509 °C is attributed to the decomposition of 1-tetradecyl-3-methylimidazolium cation. For  $[C_{12}MIM]Nb_6$ , the first weight loss of 4.7 % between 20-178 °C is attributed to the loss of water molecules. The second step weight loss of 52.4 % in the range of 178-493 °C can be ascribed to the decomposition of 1-dodecyl-3-methylimidazolium cations.

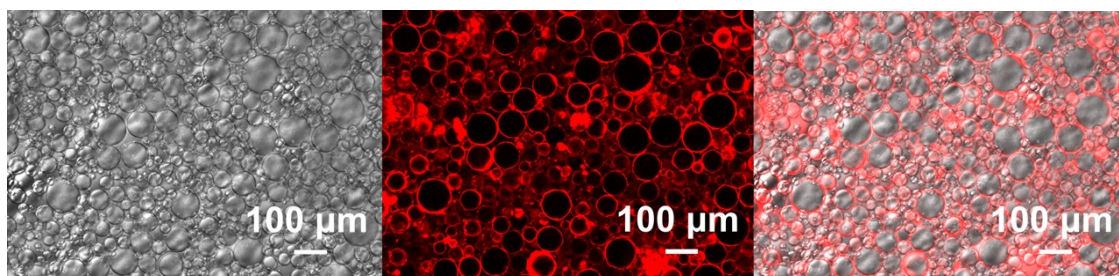

**Figure S4.** Confocal microscopy images of Pickering emulsion formed by  $H_2O_2$ -treated  $[C_{16}MIM]Nb_6$ , where the oil phase was stained by 0.01 wt% Nile Red. (left: light-field, middle: dark-field, right: superposed field)

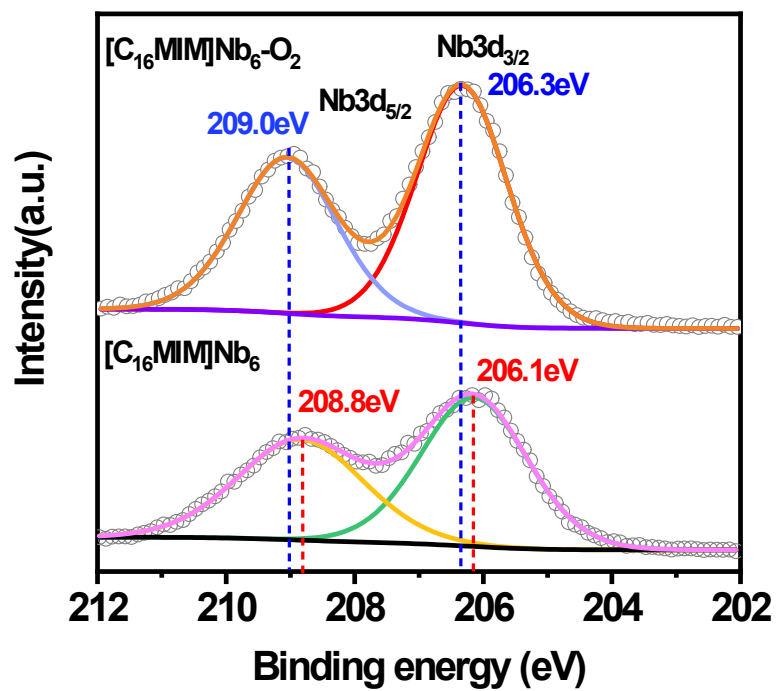

Figure S5. XPS spectra of [C<sub>16</sub>MIM]Nb<sub>6</sub> and [C<sub>16</sub>MIM]Nb<sub>6</sub>-O<sub>2</sub>.

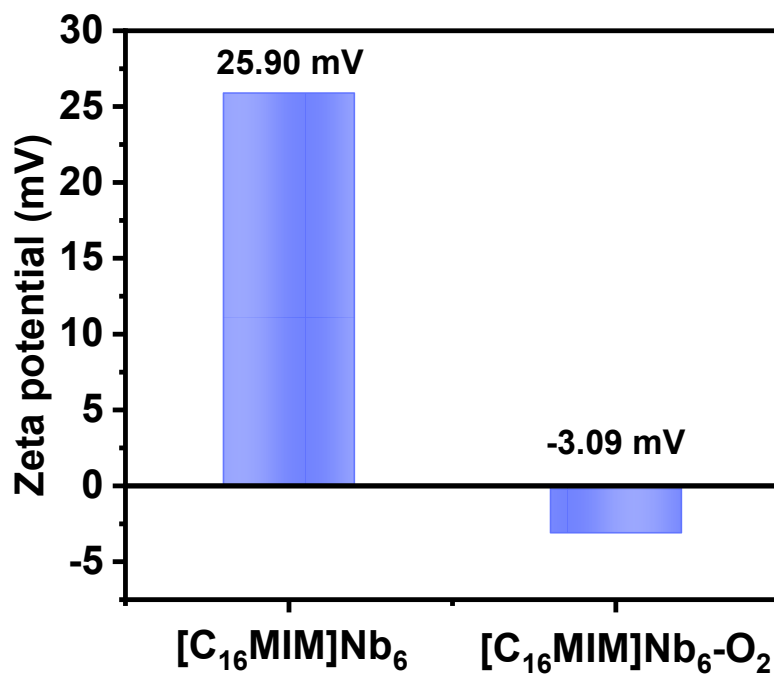

Figure S6. Zeta potential of [C<sub>16</sub>MIM]Nb<sub>6</sub> and [C<sub>16</sub>MIM]Nb<sub>6</sub>-O<sub>2</sub>.

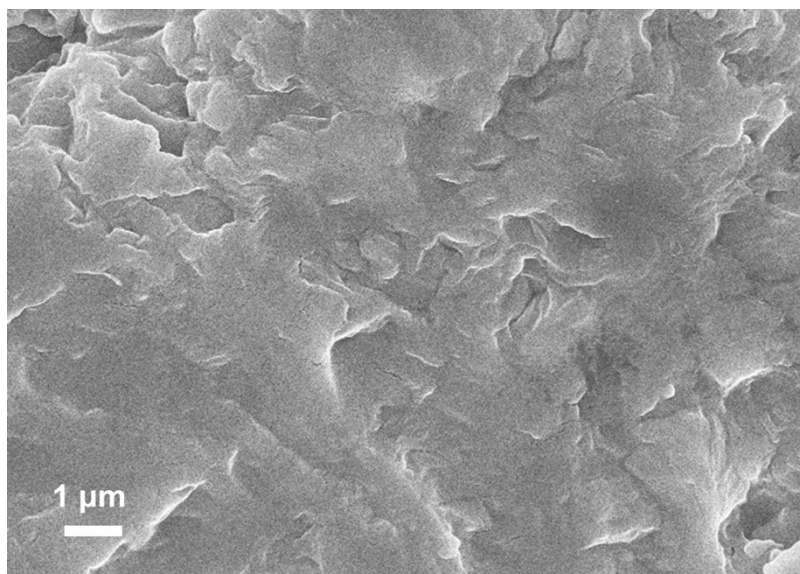

Figure S7. SEM image of [C<sub>16</sub>MIM]Nb<sub>6</sub>.

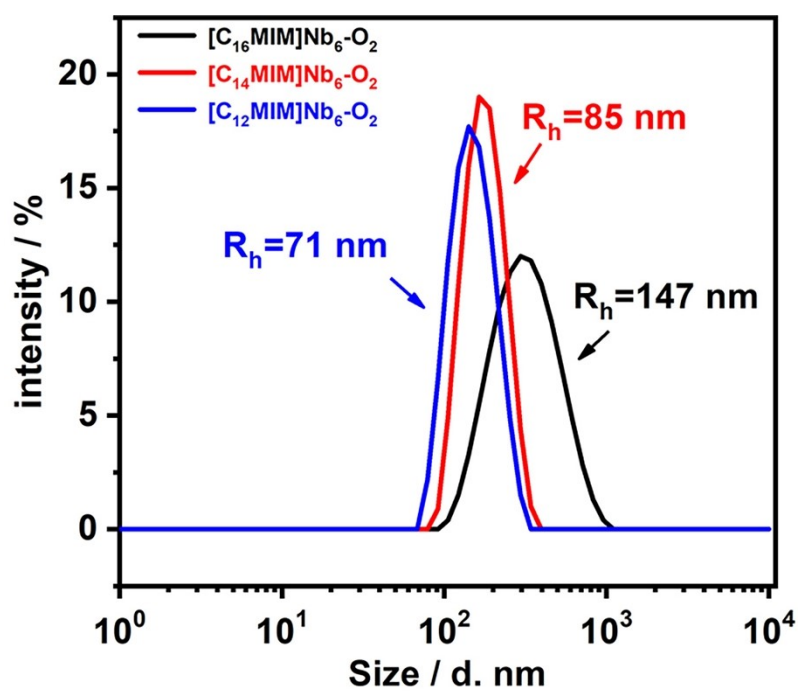

Figure S8. Particle size of the three amphiphilic hexaniobate-based ionic liquids measured by DLS.

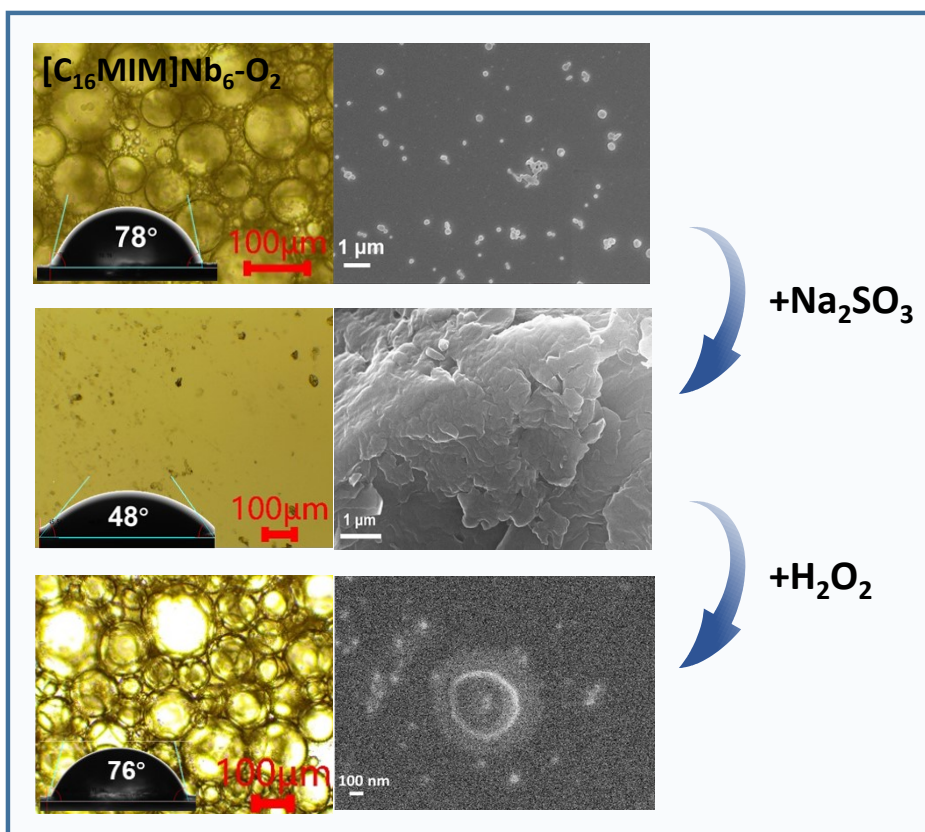

**Figure S9.** Optical micrographs of the Pickering emulsion stabilized by  $[\text{C}_{16}\text{MIM}]\text{Nb}_6\text{-O}_2$  (left) and SEM images of the emulsifiers (right).

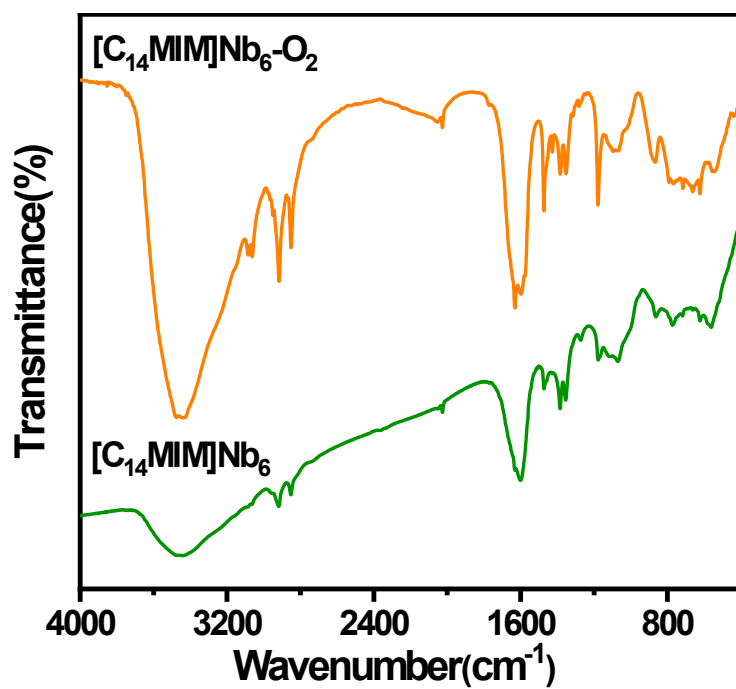

Figure S10. FT-IR spectra of [C<sub>14</sub>MIM]Nb<sub>6</sub> and [C<sub>14</sub>MIM]Nb<sub>6</sub>-O<sub>2</sub>.

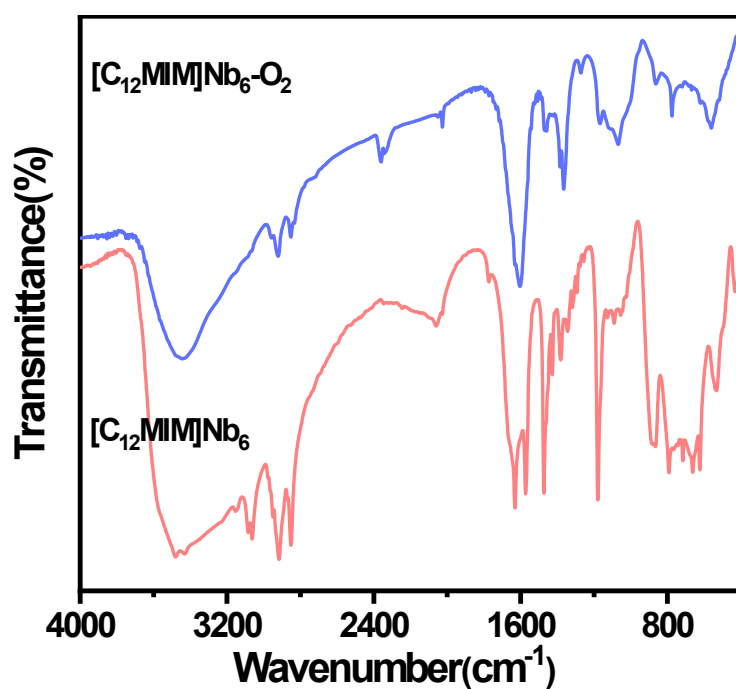

Figure S11. FT-IR spectra of [C<sub>12</sub>MIM]Nb<sub>6</sub> and [C<sub>12</sub>MIM]Nb<sub>6</sub>-O<sub>2</sub>.



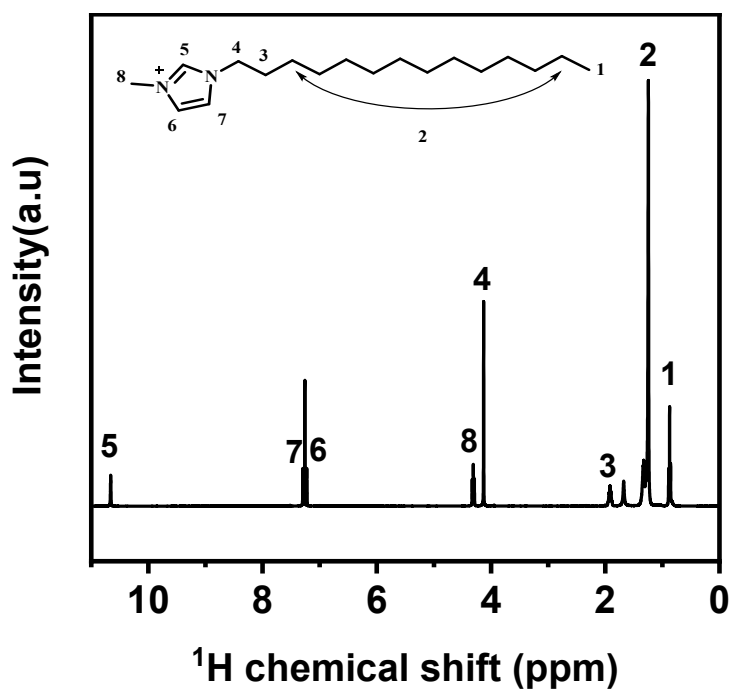

**Figure S12.**  $^1\text{H}$  NMR spectra of  $[\text{C}_{14}\text{MIM}]\text{Nb}_6$  in  $\text{CDCl}_3$ .  $^1\text{H}$  NMR (400 MHz,  $\text{CDCl}_3$ ) of  $[\text{C}_{14}\text{MIM}]\text{Nb}_6$ ,  $\delta$  10.66 (s, 1H), 7.29 (s, 1H), 7.23 (s, 1H), 4.31 (t,  $J = 7.5$  Hz, 2H), 4.13 (s, 3H), 1.91 (dd,  $J = 14.1, 7.1$  Hz, 2H), 1.40 – 1.15 (m, 22H), 0.91 – 0.82 (m, 3H).

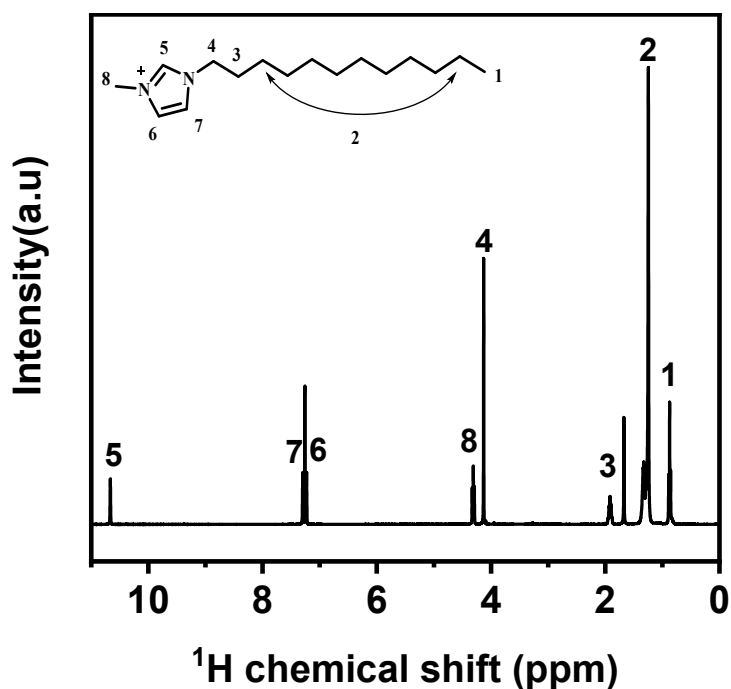

**Figure S13.**  $^1\text{H}$  NMR spectra of  $[\text{C}_{12}\text{MIM}]\text{Nb}_6$  in  $\text{CDCl}_3$ .  $^1\text{H}$  NMR (400 MHz,  $\text{CDCl}_3$ ) of  $[\text{C}_{12}\text{MIM}]\text{Nb}_6$ ,  $\delta$  10.67 (s, 1H), 7.30 (s, 1H), 7.23 (s, 1H), 4.31 (t,  $J = 7.5$  Hz, 2H), 4.13 (s, 3H), 1.91 (dd,  $J = 14.3, 7.3$  Hz, 2H), 1.39 – 1.20 (m, 18H), 0.91 – 0.82 (m, 3H).

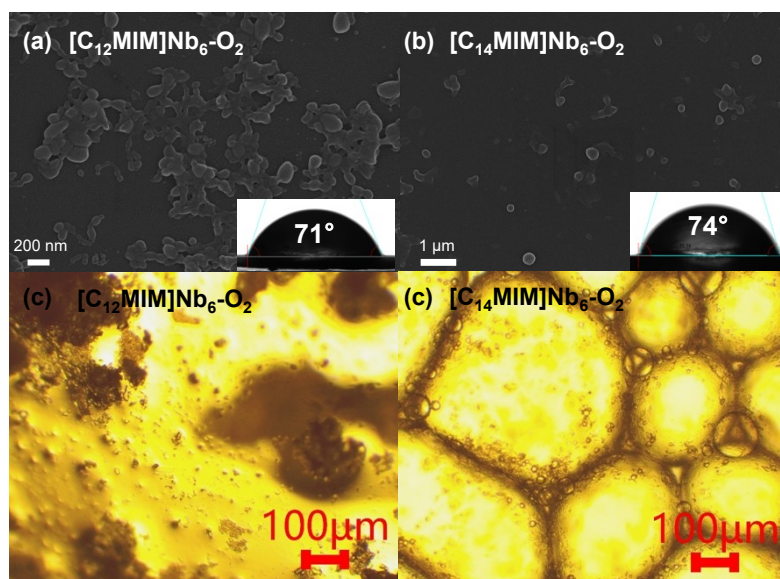

**Figure S14.** (a) SEM image of  $[\text{C}_{12}\text{MIM}]\text{Nb}_6\text{-O}_2$  (inset: water contact angle); (b) SEM image of  $[\text{C}_{14}\text{MIM}]\text{Nb}_6\text{-O}_2$  (inset: water contact angle); (c) microscope photograph of the oil-water system containing  $[\text{C}_{12}\text{MIM}]\text{Nb}_6\text{-O}_2$ ; (d) microscope photograph of Pickering emulsion stabilized by  $[\text{C}_{14}\text{MIM}]\text{Nb}_6\text{-O}_2$ .

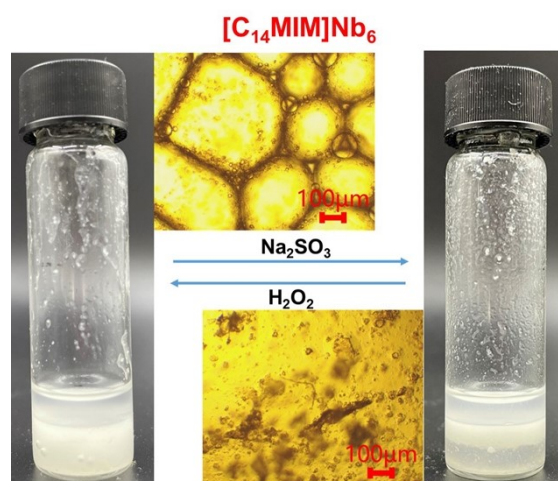

**Figure S15.** The optical micrographs of the reversible redox-triggered emulsification and demulsification of the Pickering emulsion containing  $[\text{C}_{14}\text{MIM}]\text{Nb}_6\text{-O}_2$ .

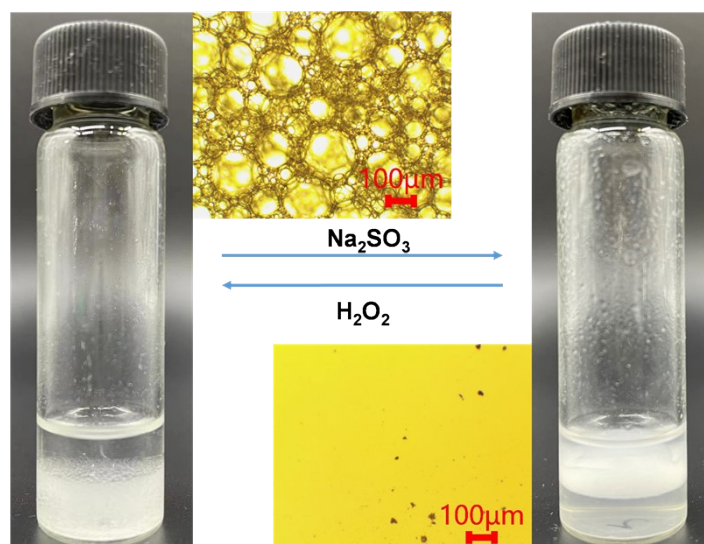

**Figure S16.** Optical micrographs of isooctane-water emulsion system stabilized with  $[\text{C}_{16}\text{MIM}]\text{Nb}_6\text{-O}_2$ .

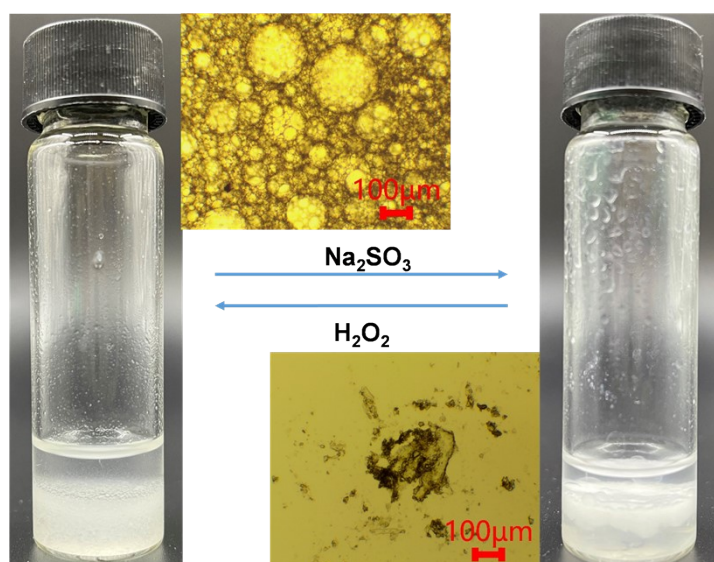

**Figure S17.** Optical micrographs of *n*-heptane-water emulsion system stabilized with  $[\text{C}_{16}\text{MIM}]\text{Nb}_6\text{-O}_2$ .

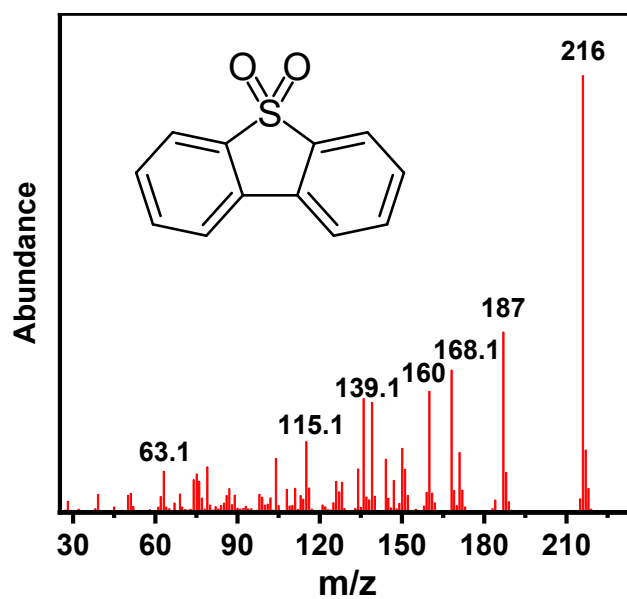

**Figure S18.** The GC-MS spectrum of the oxidation product of DBT.

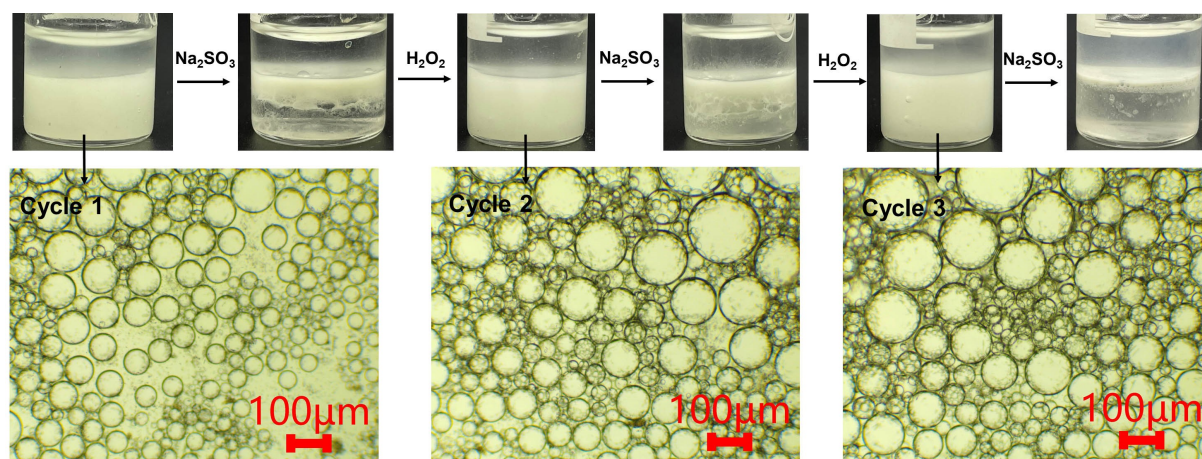

**Figure S19.** The optical micrographs of emulsion droplets in the recycle test.

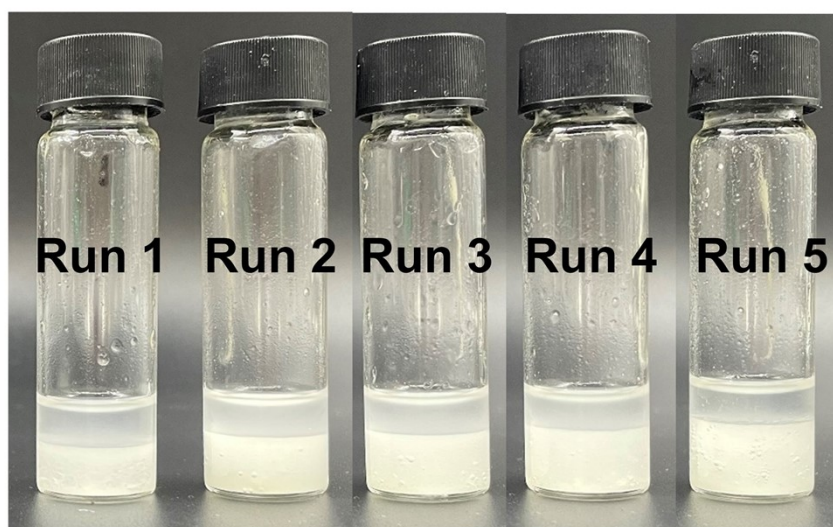

**Figure S20.** Photographs of redox-responsive Pickering emulsion.

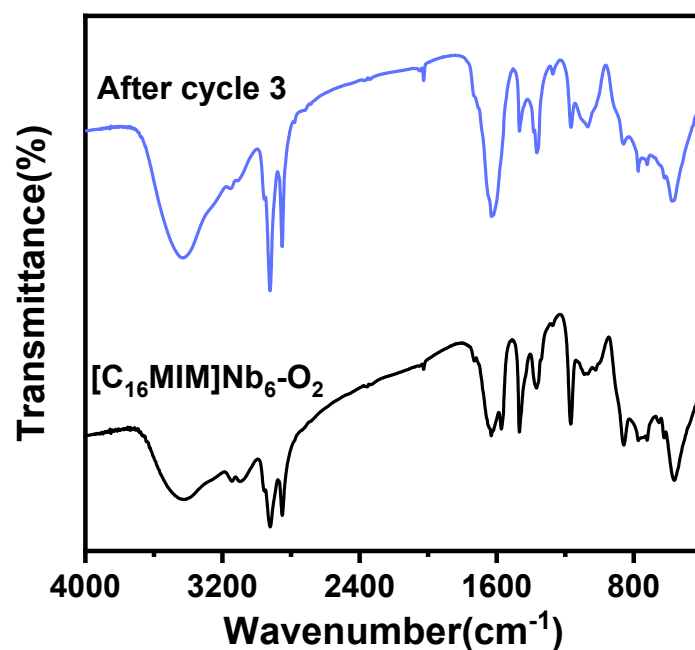

**Figure S21.** FT-IR spectra of  $[C_{16}MIM]Nb_6-O_2$  before and after the catalytic reaction.

**Table S1** The elemental analysis of  $[C_nMIM]Nb_6$ .

| Sample            | C (wt%) | H (wt%) | N (wt%) | Nb (wt%) | Molecular formula                              |
|-------------------|---------|---------|---------|----------|------------------------------------------------|
| $[C_{16}MIM]Nb_6$ | 46.75   | 8.21    | 5.44    | 13.42    | $(C_{20}H_{39}N_2)_8Nb_6O_{19} \cdot 16H_2O$   |
| $[C_{14}MIM]Nb_6$ | 42.40   | 7.34    | 5.39    | 21.92    | $(C_{18}H_{35}N_2)_5H_3Nb_6O_{19} \cdot 5H_2O$ |
| $[C_{12}MIM]Nb_6$ | 38.69   | 6.41    | 5.56    | 25.84    | $(C_{16}H_{31}N_2)_4H_4Nb_6O_{19} \cdot 5H_2O$ |

**Table S2.** Oxidative desulfurization of DBT and other S-containing compounds in the Pickering emulsion system.

| Entry          | Substrate | Time    | Conversion (%) |
|----------------|-----------|---------|----------------|
| 1 <sup>a</sup> | DBT       | 40 min  | >99            |
| 2 <sup>a</sup> | BT        | 60 min  | >99            |
| 3 <sup>a</sup> | DT        | 120 min | >99            |
| 4 <sup>b</sup> | 4,6-DMDBT | 12 h    | 70             |

[a] Reaction conditions:  $[C_{16}MIM]Nb_6-O_2$  (0.003 mmol),  $H_2O_2$  (0.3 mmol), n-octane (1 mL) containing substrate (800 ppm),  $H_2O$  (1 mL), 40 °C. [b]  $[C_{16}MIM]Nb_6-O_2$  (0.003 mmol),  $H_2O_2$  (1 mmol), n-octane (1 mL) containing substrate (800 ppm),  $H_2O$  (1 mL), 60 °C.

**Table S3** Comparison of stimuli-responsive emulsion systems.

| Emulsifier                                                                                                                                                                                                                     | Stimulus response type          | Demulsification                        |           |         | Stimulus response site | Catalytic application | Ref.      |
|--------------------------------------------------------------------------------------------------------------------------------------------------------------------------------------------------------------------------------|---------------------------------|----------------------------------------|-----------|---------|------------------------|-----------------------|-----------|
|                                                                                                                                                                                                                                |                                 | Method                                 | Temp. /°C | Time    |                        |                       |           |
| [C <sub>16</sub> MIM]Nb <sub>6</sub> -O <sub>2</sub>                                                                                                                                                                           | redox                           | adding Na <sub>2</sub> SO <sub>3</sub> | r.t.      | 40 s    | heterogeneous          | yes                   | This work |
| Ferrocene surfactant (FcCOC <sub>10</sub> N)/SiO <sub>2</sub>                                                                                                                                                                  | redox                           | 0.8V electrical oxidation              | -         | 2 h     | homogeneous            | no                    | 1         |
| C <sub>10</sub> -Se-C <sub>10</sub> ·(COONa) <sub>2</sub> /Al <sub>2</sub> O <sub>3</sub>                                                                                                                                      | redox                           | adding H <sub>2</sub> O <sub>2</sub>   | r.t.      | 50 s    | homogeneous            | no                    | 2         |
| C <sub>16</sub> H <sub>34</sub> N <sub>2</sub> @SiO <sub>2</sub>                                                                                                                                                               | CO <sub>2</sub> -N <sub>2</sub> | bubbling N <sub>2</sub>                | 65        | 80 min  | heterogeneous          | no                    | 3         |
| Triethylenetetramine-functionalized MOFs                                                                                                                                                                                       | CO <sub>2</sub> -N <sub>2</sub> | bubbling N <sub>2</sub>                | 50        | 30 min  | heterogeneous          | yes                   | 4         |
| N-alkylimidazoles bicarbonates<br>[C <sub>n</sub> IM] <sup>+</sup> HCO <sub>3</sub> <sup>-</sup> /SiO <sub>2</sub>                                                                                                             | CO <sub>2</sub> -N <sub>2</sub> | bubbling N <sub>2</sub>                | 25        | 40 min  | homogeneous            | no                    | 5         |
| Fe <sub>3</sub> O <sub>4</sub> @SiO <sub>2</sub> @P(TMA-DEA)                                                                                                                                                                   | CO <sub>2</sub> -N <sub>2</sub> | bubbling CO <sub>2</sub>               | r.t.      | -       | heterogeneous          | yes                   | 6         |
| (MeO) <sub>3</sub> SiCH <sub>2</sub> CH <sub>2</sub> CH <sub>2</sub> (NHCH <sub>2</sub> CH <sub>2</sub> ) <sub>2</sub> NH <sub>2</sub> @(MeO) <sub>3</sub> Si(CH <sub>2</sub> ) <sub>7</sub> CH <sub>3</sub> @SiO <sub>2</sub> | pH                              | adding HCl                             | r.t.      | 3-5 min | heterogeneous          | no                    | 7         |
| Lipase AYS@magnetic hollow mesoporous carbon nanospheres (AYS@MHMCS)                                                                                                                                                           | magnetism                       | magnetic field                         | -         | 15 min  | heterogeneous          | yes                   | 8         |
| Pd-SiO <sub>2</sub> /azobenzene                                                                                                                                                                                                | light                           | UV irradiation                         | 25        | 30 min  | homogeneous            | yes                   | 9         |
| Grafted silanes on TiO <sub>2</sub> nanoparticles                                                                                                                                                                              | light                           | UV irradiation                         | -         | 36 h    | heterogeneous          | no                    | 10        |

“-”: not mentioned

**Table S4** Comparison of polyoxometalate-based emulsion catalysts in the oxidative desulfurization of DBT.

| Catalyst                                                                                                                                        | Temp. (°C) | Extraction agent | System                      | Time   | Conv. (%) | Reference |
|-------------------------------------------------------------------------------------------------------------------------------------------------|------------|------------------|-----------------------------|--------|-----------|-----------|
| [C <sub>16</sub> MIM]Nb <sub>6</sub> -O <sub>2</sub>                                                                                            | 40         | H <sub>2</sub> O | stimuli-responsive emulsion | 40 min | >99       | This work |
| Organic-functionalized V <sub>6</sub> O <sub>19</sub>                                                                                           | 40         | H <sub>2</sub> O | emulsion                    | 80 min | 98        | 11        |
| [C <sub>16</sub> H <sub>33</sub> N(CH <sub>3</sub> ) <sub>3</sub> ] <sub>11</sub> P <sub>2</sub> W <sub>13</sub> V <sub>5</sub> O <sub>64</sub> | 60         | IL               | emulsion                    | 60 min | 98        | 12        |
| [BMIM] <sub>4</sub> SiW <sub>12</sub> O <sub>40</sub> -based Janus nanosheets                                                                   | 60         | IL               | emulsion                    | 90 min | >99       | 13        |
| PW <sub>12</sub> O <sub>40</sub> /P[tVPB-VPx]                                                                                                   | 50         | methanol         | emulsion                    | 2 h    | 99        | 14        |
| C-SiO <sub>2</sub> -PW <sub>12</sub> O <sub>40</sub>                                                                                            | 50         | acetonitrile     | emulsion                    | 2 h    | >99       | 15        |
| [(C <sub>n</sub> H <sub>2n+1</sub> ) <sub>3</sub> NCH <sub>3</sub> ] <sub>2</sub> W <sub>6</sub> O <sub>19</sub>                                | 60         | IL               | emulsion                    | 20 min | 98        | 16        |
| [C <sub>16</sub> H <sub>33</sub> N(CH <sub>3</sub> ) <sub>3</sub> ] <sub>11</sub> P <sub>2</sub> W <sub>13</sub> V <sub>5</sub> O <sub>64</sub> | 70         | IL               | emulsion                    | 45 min | 100       | 17        |
| SiO <sub>2</sub> @C-dots/PW <sub>12</sub>                                                                                                       | 50         | acetonitrile     | biphase                     | 3 h    | 100       | 18        |
| PMo <sub>12</sub> /BzPN-SiO <sub>2</sub>                                                                                                        | 60         | H <sub>2</sub> O | biphase                     | 3 h    | 100       | 19        |

## Reference

- 1 S. Yu, D. Zhang, J. Jiang and W. Xia, *ACS Sustainable Chem. Eng.*, 2019, **7**, 15904-15912.
- 2 S. Yu, H. Zhang, J. Jiang, Z. Cui, W. Xia and B. P. Binks, *Green Chem.*, 2020, **22**, 5470-5475.
- 3 J. Jiang, Y. Zhu, Z. Cui and B. P. Binks, *Angew. Chem. Int. Ed.*, 2013, **52**, 12373-12376.
- 4 Y. Shi, D. Xiong, Z. Li, H. Wang, J. Qiu, H. Zhang and J. Wang, *ACS Appl. Mater. Interfaces*, 2020, **12**, 53385-53393.
- 5 Y. Shi, D. Xiong, Y. Chen, H. Wang and J. Wang, *J. Mol. Liq.*, 2019, **274**, 239-245.
- 6 J. Tang, X. Zhou, S. Cao, L. Zhu, L. Xi and J. Wang, *ACS Appl. Mater. Interfaces*, 2019, **11**, 16156-16163.
- 7 J. Huang and H. Yang, *Chem. Commun.*, 2015, **51**, 7333-7336.
- 8 T. Yang, Y. Zhang, J. Wang, F. Huang and M. Zheng, *ACS Sustainable Chem. Eng.*, 2021, **9**, 12070-12078.
- 9 Z. Li, Y. Shi, A. Zhu, Y. Zhao, H. Wang, B. P. Binks and J. Wang, *Angew. Chem. Int. Ed.*, 2021, **60**, 3928-3933.
- 10 Q. Zhang, R. X. Bai, T. Guo and T. Meng, *ACS Appl. Mater. Interfaces*, 2015, **7**, 18240-18246.
- 11 Y. Ding, W. Zhu, H. Li, W. Jiang, M. Zhang, Y. Duan and Y. Chang, *Green Chem.*, 2011, **13**, 1210-1216.
- 12 P. Yin, J. Wang, Z. Xiao, P. Wu, Y. Wei and T. Liu, *Chem. Eur. J.*, 2012, **18**, 9174-9178.
- 13 D. Julião, A. C. Gomes, M. Pillinger, R. Valença, J. C. Ribeiro, B. D. Castro, I. S. Gonçalves, L. C. Silva and S. S. Balula, *Eur. J. Inorg. Chem.*, 2016, DOI: 10.1002/ejic.201600442, 5114-5122.
- 14 F. Banisharif, M. R. Dehghani and J. M. Campos-Martin, *Energy Fuels*, 2017, **31**, 5419-5427.
- 15 F. Banisharif, M. R. Dehghani, M. Capel-Sánchez and J. M. Campos-Martin, *Ind. Eng. Chem. Res.*, 2017, **56**, 3839-3852.
- 16 M. Craven, X. Dong, C. Kunstmann-Olsen, E. F. Kozhevnikova, F. Blanc, A. Steiner and I. V. Kozhevnikov, *Appl. Catal. B Environ.*, 2018, **231**, 82-91.
- 17 Y. Q. Zhang and R. Wang, *Appl. Catal. B Environ.*, 2018, **234**, 247-259.
- 18 S. Y. Dou and R. Wang, *Chem. Eng. J.*, 2019, **369**, 64-76.
- 19 R. Xia, W. Lv, K. Zhao, S. Ma, J. Hu, H. Wang and H. Liu, *Langmuir*, 2019, **35**, 3963-3971.
